# Supplementary material
Source: PubMed Central journal article supplement (PMC3616433)
Supplement: cr201330x1.pdf [file cr201330x1.pdf]

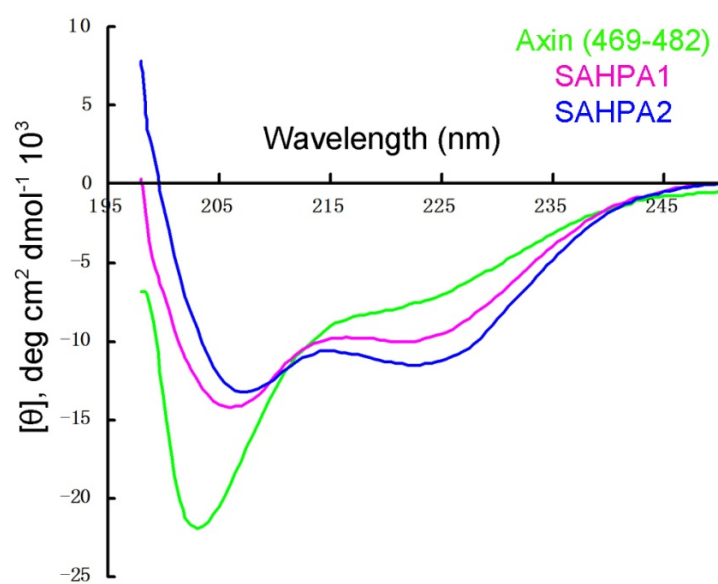

**Supplementary information, Figure S1** Circular dichroism spectroscopy of SAHPAs illustrates the incremental effects of synthetic modification.
