# Supplementary material
Source: PubMed Central journal article supplement (PMC3616433)
Supplement: cr201330x3.pdf [file cr201330x3.pdf]

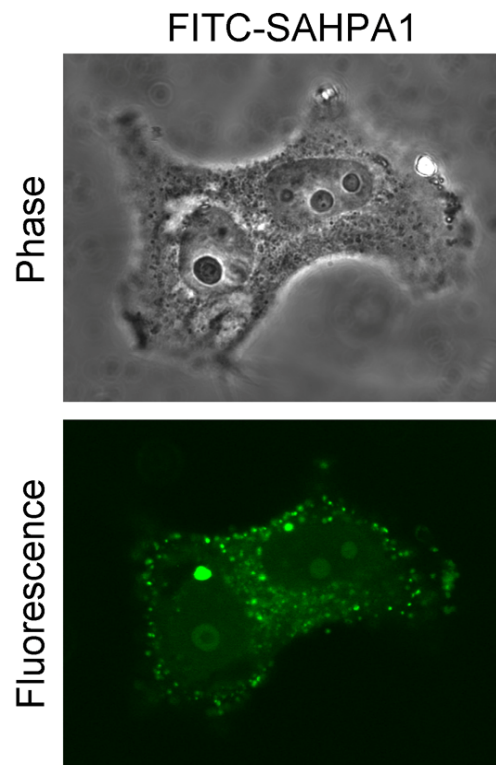

**Supplementary information, Figure S3** Confocal microscopic image of FITC-SAHPA1 treated HeLa cells. Cells were incubated with FITC-SAHPA1 (10  $\mu$ M) for 4 hours and then washed with PBS twice before fixation for confocal microscopy.
