# Supplementary material
Source: PubMed Central journal article supplement (PMC3616433)
Supplement: cr201330x5.pdf [file cr201330x5.pdf]

## **Supplementary information, Materials and Methods**

### ***Reagents and antibodies.***

Recombinant TGF- $\beta$ 1, Wnt3a, and BMP4 were obtained from R&D Systems, recombinant LIF from Chemicon, and N2 and B27 from Invitrogen. Antibodies were purchased from Santa Cruz ( $\alpha$ -GST tag,  $\alpha$ - $\beta$ -catenin and  $\alpha$ -Tubulin), Millipore ( $\alpha$ -active  $\beta$ -catenin) and GE Healthcare (ECL HRP linked anti-mouse IgG and ECL HRP linked anti-rabbit IgG). Wnt3a CM was generated in our lab [1] and  $\alpha$ -Axin2 antibody was generated by SC Lin [2].

### ***Peptide synthesis.***

All peptides were synthesized manually using standard 9-fluorenylmethoxycarbonyl (Fmoc)-peptide chemistry on Rink Amind AM resin, and cross-linked using Grubbs-I catalyst. Peptides were synthesized as previously described [3].

### ***Determination of $\alpha$ -helicity.***

Peptides were dissolved in PBS buffer to concentration 50  $\mu$ M. We obtained the CD spectra on a Jasco J-715 spectropolarimeter at 25°C. We collected the spectra using 0.2 cm pathlength quartz with the following parameters: wavelength, 190-255 nm; step resolution, 0.5 nm; speed, 20 nm/min; accumulations, 3. We calculated the helical content of each peptide as reported previously [4].

### ***In vitro pulldown assay.***

GST- $\beta$ -catenin (133-665) fusion protein was expressed in E. coli and purified with glutathione-sepharose (Amersham Pharmacia Biotech). The streptavidin beads

(Thermo) binding biotin-SAHAPAs were washed extensively with binding buffer (50mM Tris-HCl pH 8.0, 250mM NaCl) and were incubated with purified GST- $\beta$ -catenin (133-665), respectively, for 6 hour at 4°C. Bound proteins were extracted with loading buffer and analyzed by immunoblotting..

***Isothermal titration calorimetry.***

$\beta$ -catenin (133-665) was obtained after on-beads-cleavage of GST- $\beta$ -catenin (133-665) fusion protein with Thrombin (Sigma). ITC was performed as previously described [5].

***Cell cultures and transfection.***

Hela, HEK293T and HEK293 were maintained in DMEM medium supplemented with 10% FBS (Hyclone) in a 37°C humidified incubator containing 5% CO<sub>2</sub>. R1 cells were maintained as described previously [6]. For serum- and feeder-free culture, cells were grown on gelatinized tissue culture plates in N2B27 medium [7] with indicated (in the figure legends) concentrations of Wnt3a (R&D Systems), SAHPA1, LIF (Chemicon), and/or BMP4 (R&D Systems). Transfection was performed with VifoFect (Vigorous) following the manufacturer's recommendations.

***Reporter assay, immunoblotting, immunoprecipitation and alkaline phosphatase (AP) staining.***

These assays were performed as previously described [8].

***Quantitative RT-PCR (qRT-PCR).***

Total RNA was extracted with Trizol reagent (Invitrogen) and cDNA was synthesized

with Revertra Ace (Toyobo). A Mx3000p Quantitative PCR system (Stratagene) was employed to perform qRT-PCR using EvaGreen dye (Biotium). The primers were:

human c-myc (5'-TCTCCTTGCAGCTGCTTAG-3' and 5'-GTCGTAGTCGAGGTCATAG-3'), human axin2 (5'-AGTGTGAGGTCCACGGAAAC-3' and 5'-CTTCACACTGCGATGCATTT-3'), human cyclin D-1 (5'-CTGGCCATGAACTACCTGGA-3' and 5'-CTCCGCCTCTGGCATTG-3'), human GAPDH (5'-GAAGGTGAAGGTCGGAGTC-3' and 5'-GAAGATGGTGATGGGATTTC-3'), mouse Oct4 (5'-CACGAGTGGAAAGCAACTCA-3' and 5'-AGATGGTGGTCTGGCTGAAC-3'), mouse Nanog (5'-ACCTGAGCTATAAGCAGGTTAAGAC-3' and 5'-GTGCTGAGCCCTTCTGAATCAGAC-3'), mouse Rex1 (5'-GATTCACATCCTAACCCACGCA-3' and 5'-TATCCCCAGTGCCTCTGTCATT-3'), mouse Sox1 (5'-TTACTTCCC GCCAGCTCTTC-3' and 5'-TGATGCATTTTGGGGGTATCTCTC-3'), mouse nestin (5'-CTGCAGGCCACTGAAAAGT-3' and 5'-TTCCAGGATCTGAGCGATCT-3') and mouse GAPDH (5'-CATGGCCTTCCGTGTTCCCTA-3' and 5'-CCTGCTTCACCACCTTCTTGAT-3').

***Statistic analysis.***

All the values were shown as mean  $\pm$  SEM (n=3). The significance between groups was determined by Student's T test.

## References

- 1 Gao C, Cao W, Bao L *et al.* Autophagy negatively regulates Wnt signalling by promoting Dishevelled degradation. *Nat Cell Biol* 2010; **12**:781-790.
- 2 Rui Y, Xu Z, Lin S *et al.* Axin stimulates p53 functions by activation of HIPK2 kinase through multimeric complex formation. *EMBO J* 2004; **23**:4583-4594.
- 3 Kim YW, Grossmann TN, Verdine GL. Synthesis of all-hydrocarbon stapled alpha-helical peptides by ring-closing olefin metathesis. *Nature protocols* 2011; **6**:761-771.
- 4 Chen X, Zhang X, Chen K, Li Q. Optical wavelet-matched filtering with bacteriorhodopsin films. *Applied optics* 1997; **36**:8413-8416.
- 5 Oberstein A, Jeffrey PD, Shi Y. Crystal structure of the Bcl-XL-Becn1 peptide complex: Becn1 is a novel BH3-only protein. *J Biol Chem* 2007; **282**:13123-13132.
- 6 Li Z, Fei T, Zhang J *et al.* BMP4 Signaling Acts via dual-specificity phosphatase 9 to control ERK activity in mouse embryonic stem cells. *Cell Stem Cell* 2012; **10**:171-182.
- 7 Ying QL, Nichols J, Chambers I, Smith A. BMP induction of Id proteins suppresses differentiation and sustains embryonic stem cell self-renewal in collaboration with STAT3. *Cell* 2003; **115**:281-292.
- 8 Zhao B, Wang Q, Du J *et al.* PICK1 promotes caveolin-dependent degradation of TGF-beta type I receptor. *Cell Res* 2012.
